# Supplementary material for: Full-Length Isoform Sequencing Reveals Novel Transcripts and Substantial Transcriptional Overlaps in a Herpesvirus
Source: PubMed Central journal article supplement (PMC5042381; doi:10.1371/journal.pone.0162868), 2016-09-29

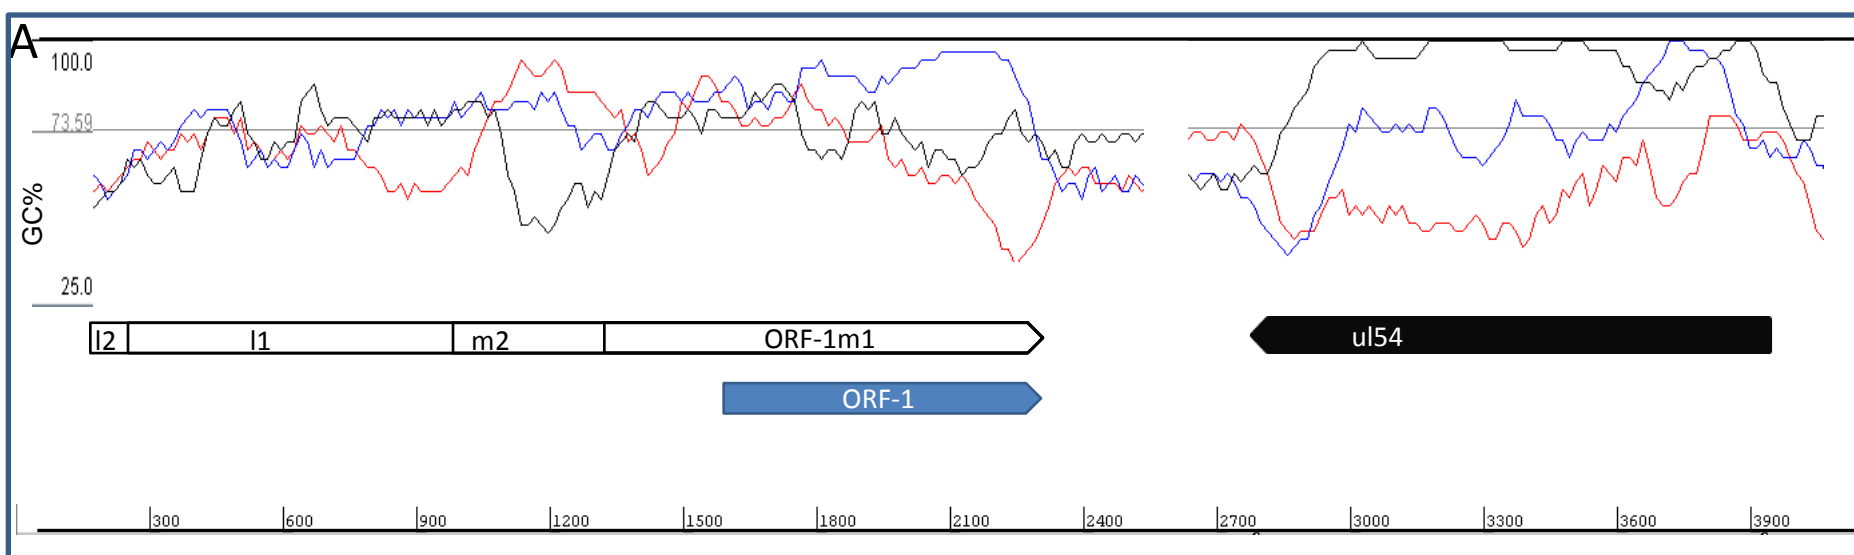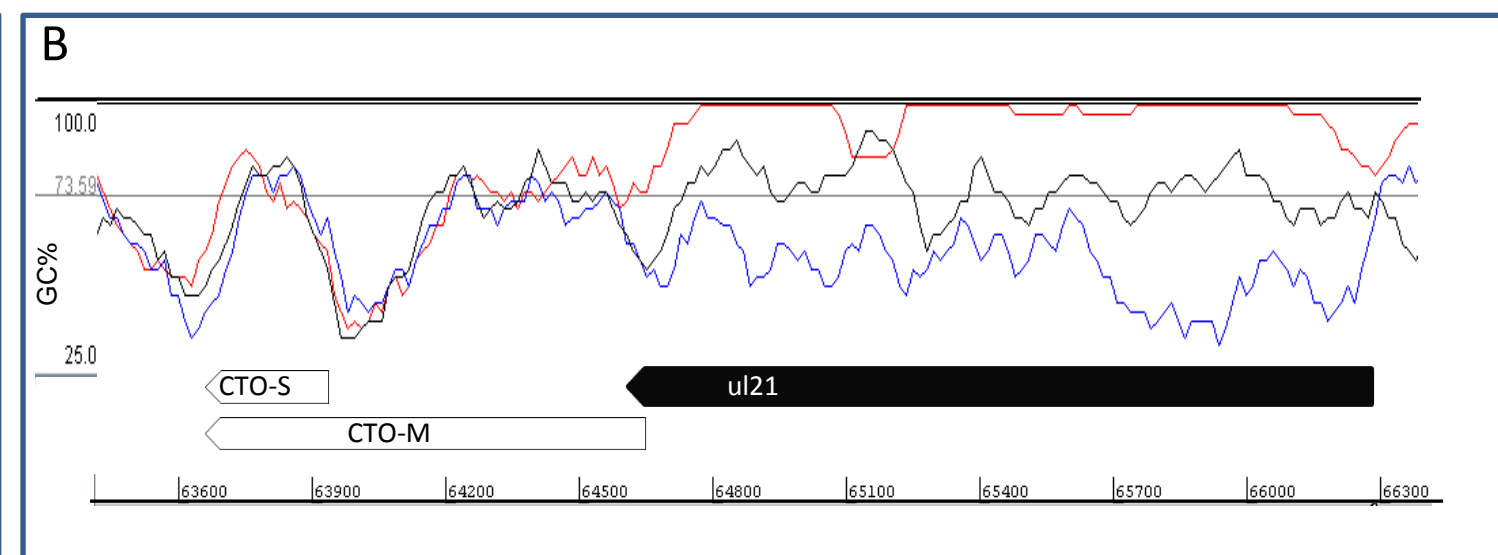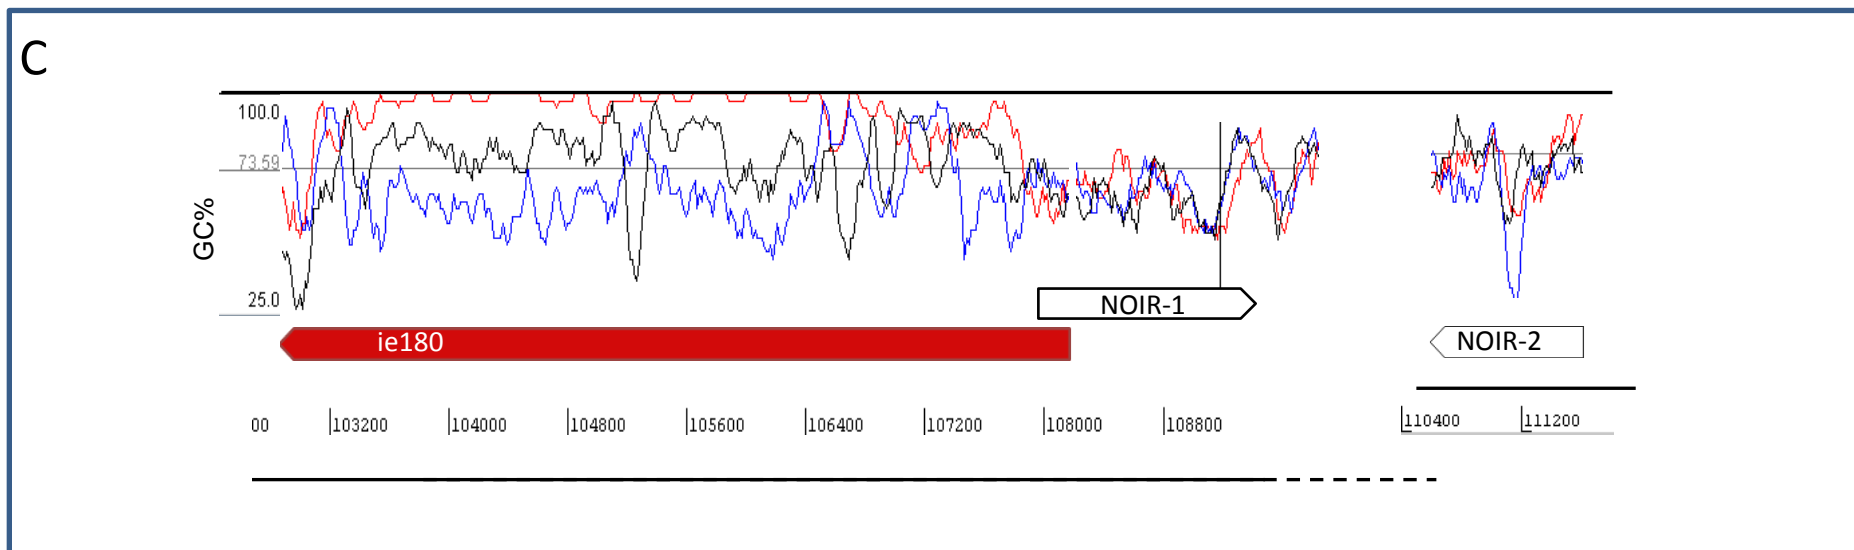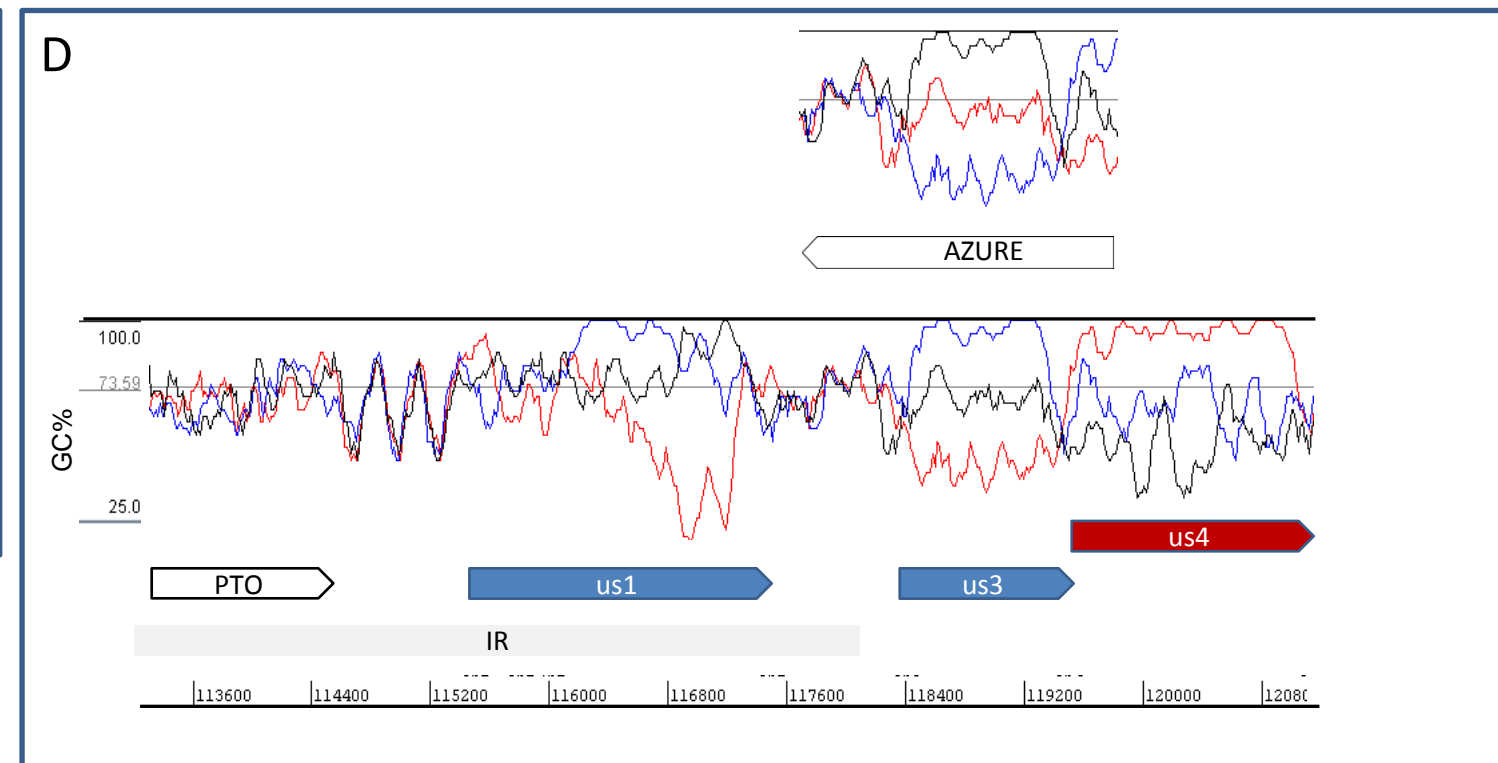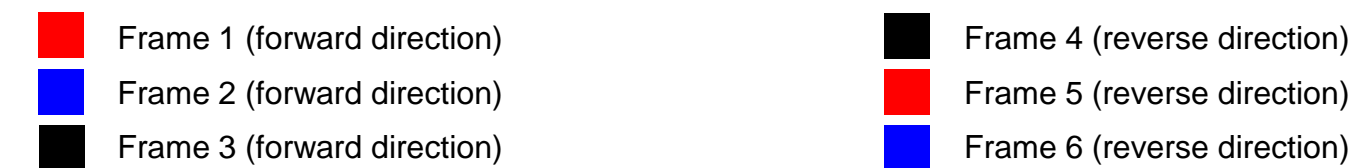

Supplement: pone.0162868.s003.pdf [file pone.0162868.s003.pdf]
