# Supplementary material for: Full-Length Isoform Sequencing Reveals Novel Transcripts and Substantial Transcriptional Overlaps in a Herpesvirus
Source: PubMed Central journal article supplement (PMC5042381; doi:10.1371/journal.pone.0162868), 2016-09-29
Supplement: pone.0162868.s004.pdf [file pone.0162868.s004.pdf]

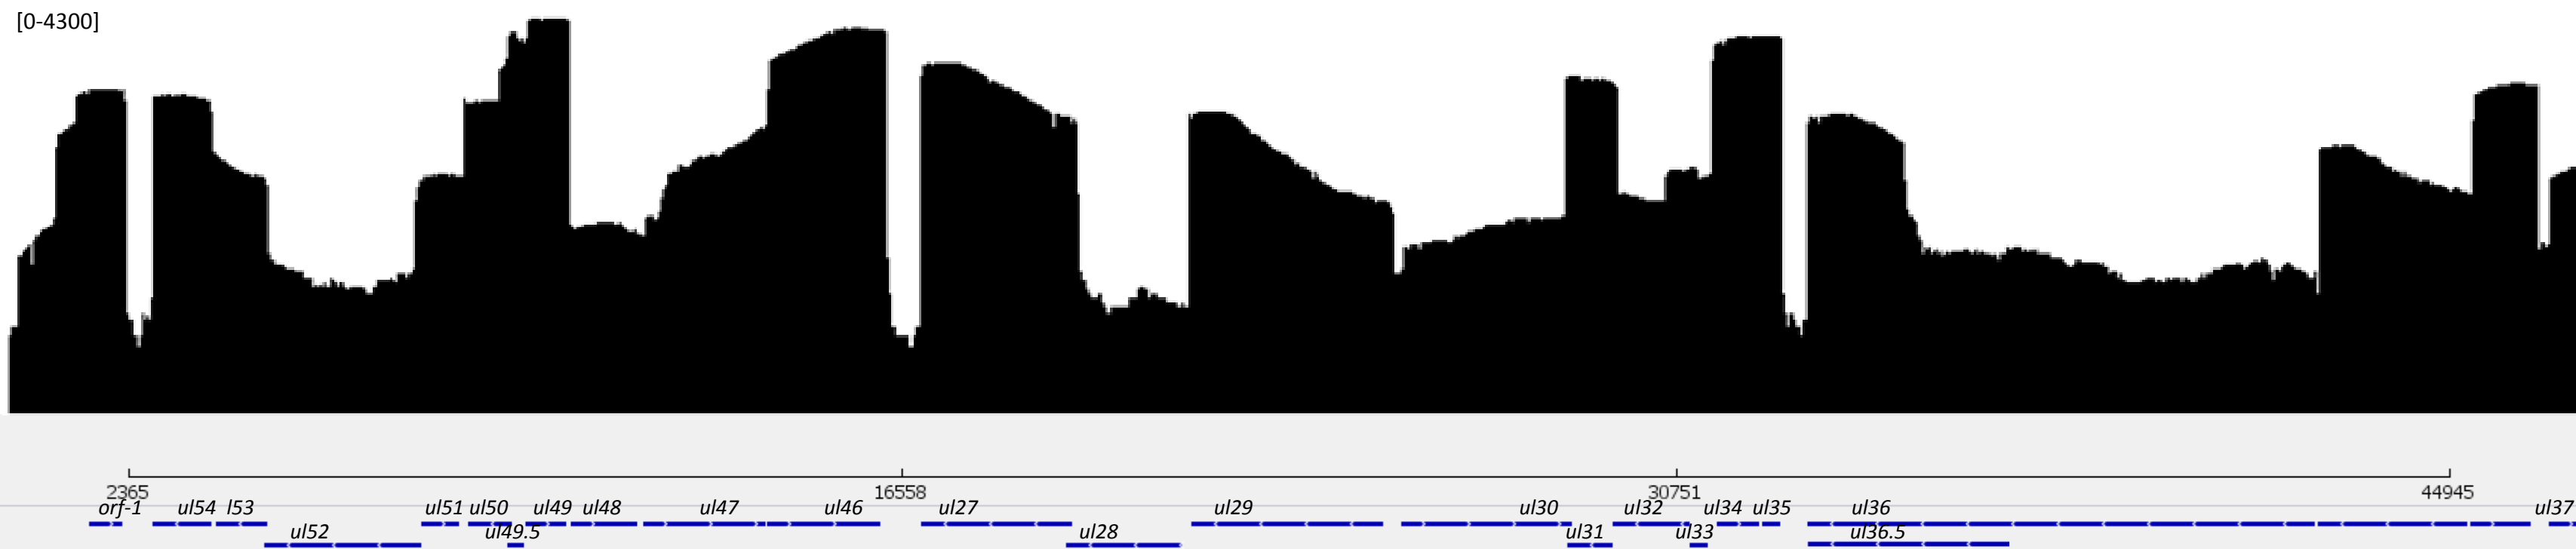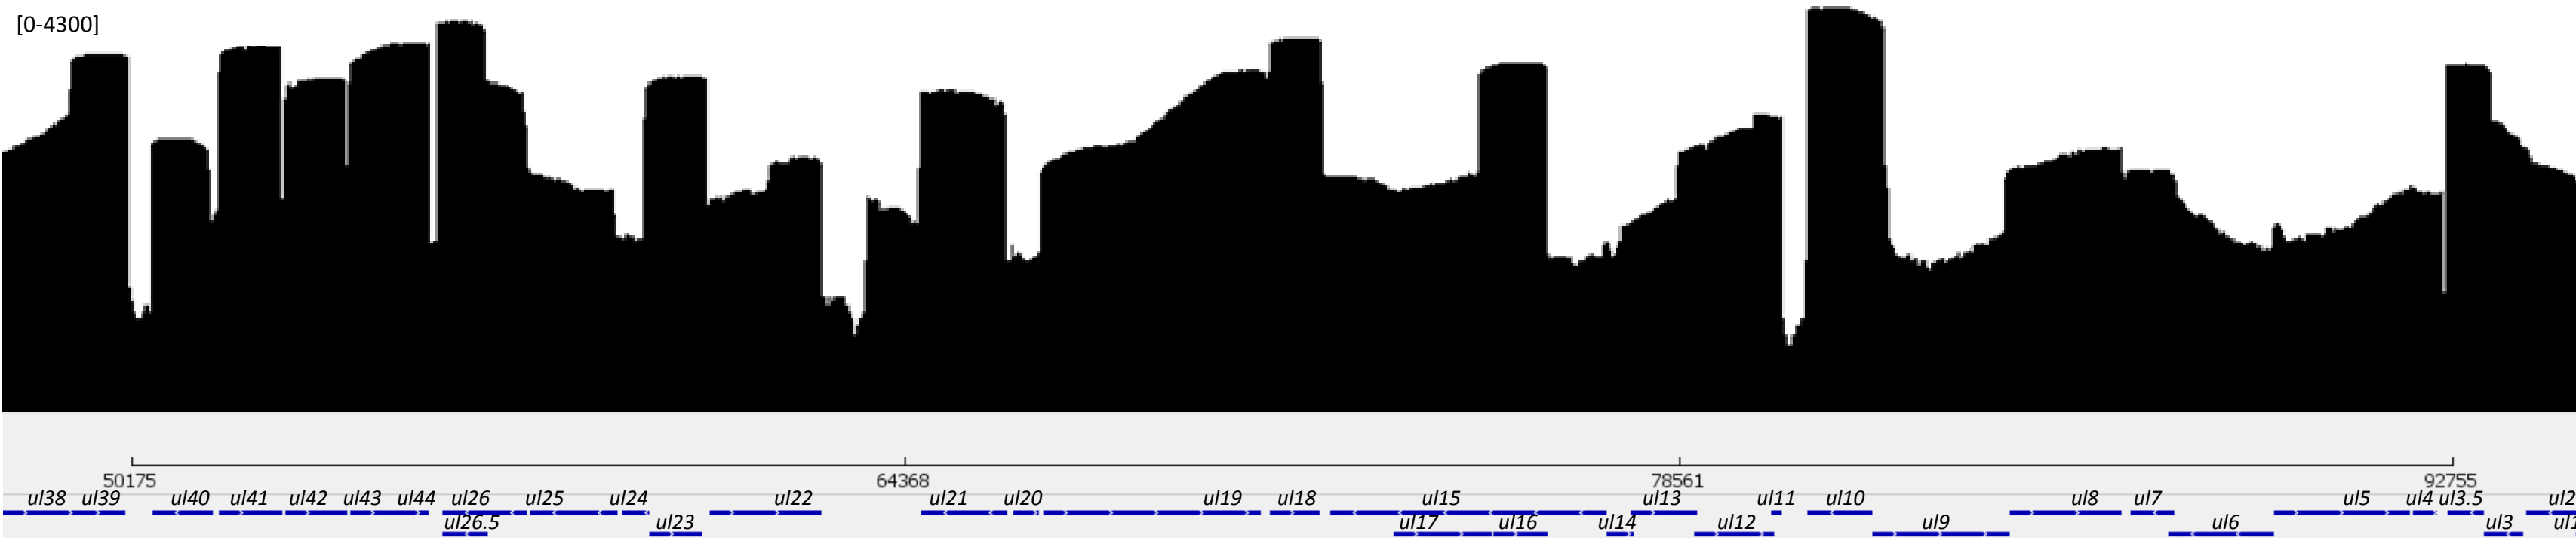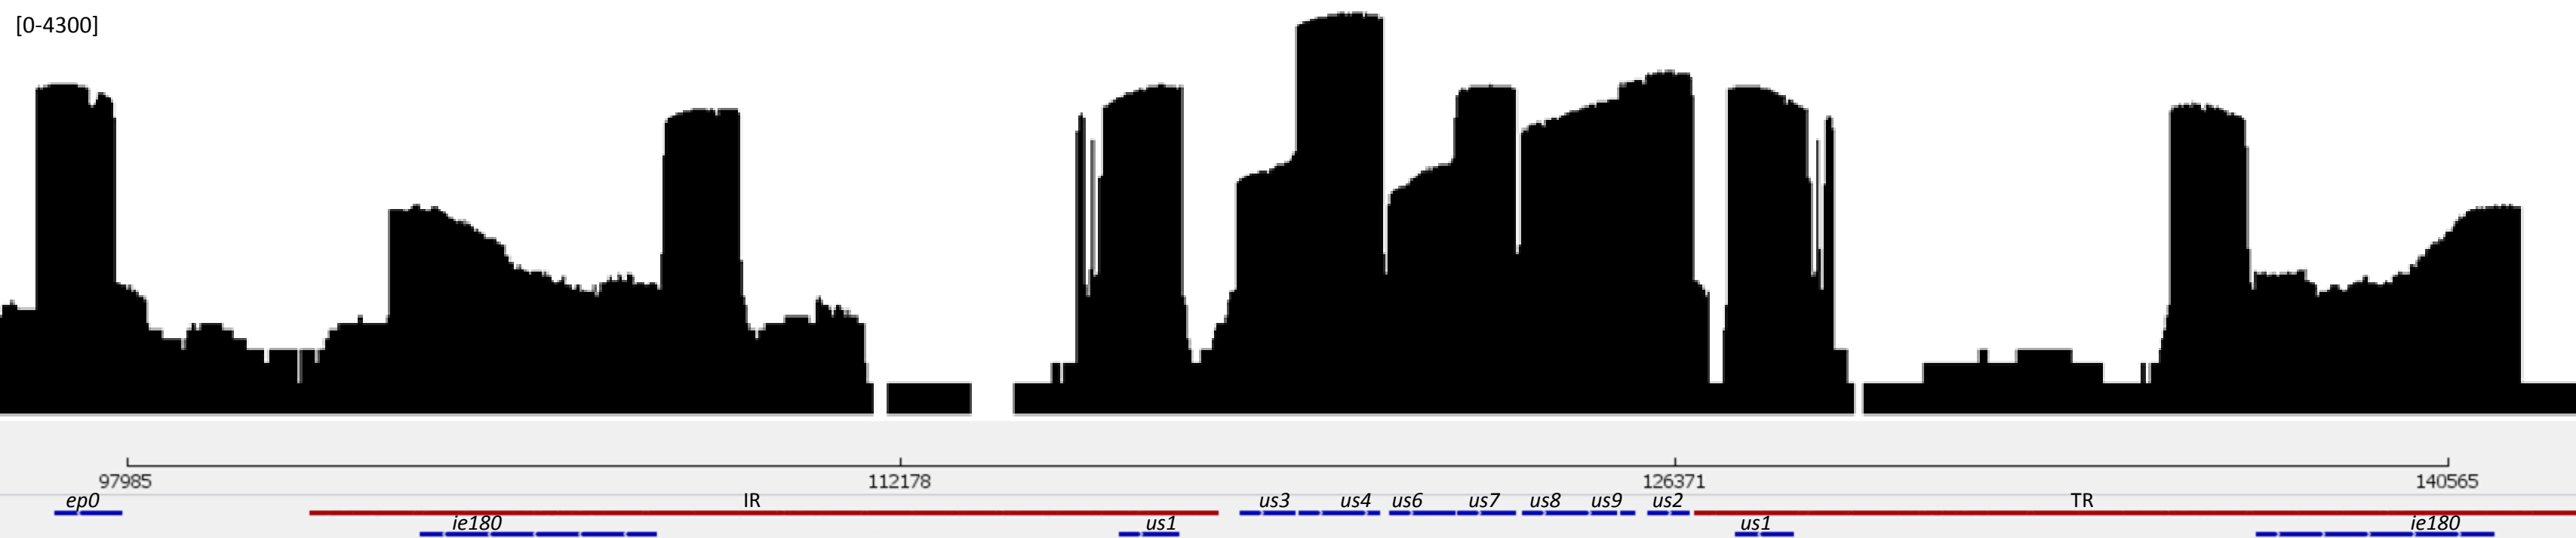

PRV ORFs      Inverted repeats
